# Supplementary material for: Long-Term Effects of a Classic Ketogenic Diet on Ghrelin and Leptin Concentration: A 12-Month Prospective Study in a Cohort of Italian Children and Adults with GLUT1-Deficiency Syndrome and Drug Resistant Epilepsy
Source: PubMed Central journal article supplement (PMC6722776; doi:10.3390/nu11081716), 2019-07-25
Supplement: nutrients-11-01716-s001.pdf [file nutrients-11-01716-s001.pdf]

**Table S1.** Time course of the diet composition.

|                            | CHILDREN AND ADOLESCENTS |      |          |      |           |      |         | ADULTS   |      |          |      |           |      |         |
|----------------------------|--------------------------|------|----------|------|-----------|------|---------|----------|------|----------|------|-----------|------|---------|
|                            | (n=25)                   |      |          |      |           |      |         | (n=5)    |      |          |      |           |      |         |
|                            | Baseline                 |      | 6 months |      | 12 months |      | P-value | Baseline |      | 6 months |      | 12 months |      | P-value |
| Mean                       | sd                       | Mean | sd       | Mean | sd        | Mean |         | sd       | Mean | sd       | Mean | sd        |      |         |
| Energy intake (kcal/day)   | 1373                     | 518  | 1313     | 358  | 1335      | 341  | 0.104   | 1938     | 325  | 1934     | 313  | 1895      | 345  | 0.824   |
| Energy intake/BW (kcal/kg) | 61.5                     | 21.3 | 58.9     | 23.2 | 59.5      | 22   | 0.874   | 31.6     | 9.5  | 31.7     | 8.6  | 30.8      | 9.8  | 0.792   |
| Protein (g/day)            | 26.4                     | 12.4 | 26.5     | 12.9 | 26.9      | 10.1 | 0.797   | 59.0     | 16.9 | 61.0     | 20.8 | 58.8      | 19.1 | 0.216   |
| Protein/BW (g/kg)          | 1.2                      | 0.5  | 1.3      | 0.8  | 1.3       | 0.6  | 0.292   | 1.0      | 0.3  | 1.05     | 0.35 | 1         | 0.3  | 0.894   |
| Protein (%)                | 8                        | 2    | 8        | 2    | 8         | 2    | 0.806   | 13       | 5    | 13       | 5    | 13        | 5    | 0.797   |
| Fat (g/day)                | 131.3                    | 51.0 | 128.2    | 49.0 | 129.4     | 50.5 | 0.090   | 177.6    | 43.5 | 175.8    | 44.1 | 180.2     | 35.3 | 0.806   |
| Fat/BW (g/kg)              | 5.0                      | 2.0  | 5.4      | 2.8  | 5.5       | 2.6  | 0.890   | 2.9      | 1.1  | 2.8      | 0.9  | 2.9       | 0.9  | 0.795   |
| Fat (%)                    | 86                       | 5    | 87       | 6    | 87        | 6    | 0.798   | 82       | 8    | 81.0     | 9.0  | 82        | 8    | 0.810   |
| SFA (g/day)                | 47.4                     | 19.0 | 47.1     | 18.7 | 46.7      | 18.6 | 0.084   | 40.3     | 7.6  | 39.6     | 8.2  | 41        | 8.6  | 0.615   |
| SFA/BW (g/kg)              | 2.0                      | 0.7  | 1.6      | 1.1  | 1.9       | 1.2  | 0.196   | 0.6      | 0.2  | 0.8      | 0.4  | 0.7       | 0.4  | 0.579   |
| SFA (%)                    | 28                       | 8    | 28       | 8    | 28        | 8    | 0.812   | 19       | 5    | 19.0     | 5.0  | 19        | 5    | 0.682   |
| Carbohydrate (g/day)       | 21.6                     | 12.6 | 19.8     | 11.2 | 22.5      | 11.8 | 0.474   | 20.1     | 8.7  | 22.8     | 7.9  | 19.8      | 9.2  | 0.189   |
| Carbohydrate/BW (g/kg)     | 1.1                      | 0.9  | 1.1      | 1    | 1.2       | 0.8  | 0.849   | 0.4      | 0.1  | 0.52     | 0.35 | 0.3       | 0.1  | 0.211   |
| Carbohydrates (%)          | 7                        | 4    | 7        | 4    | 7         | 4    | 0.880   | 4        | 2    | 4.0      | 3.0  | 4         | 2    | 0.356   |
| Ketogenic ratio            | 2.9                      | 0.8  | 2.7      | 0.7  | 2.7       | 0.5  | 0.500   | 2.5      | 0.9  | 2.3      | 1.0  | 2.4       | 0.6  | 0.192   |
